# Supplementary material
Source: PubMed Central journal article supplement (PMC7305317)
Supplement: 41396_2020_641_MOESM1_ESM.pdf [file 41396_2020_641_MOESM1_ESM.pdf]

Supplementary Material for

**High cell densities favor lysogeny: Induction of an H2O prophage is repressed by quorum sensing and enhances biofilm formation in *Vibrio anguillarum***

by Demeng Tan, Mads Frederik Hansen, Luís Nunes de Carvalho, Henriette Lyng Røder, Mette Burmølle,  
Mathias Middelboe and Sine Lo Svenningsen

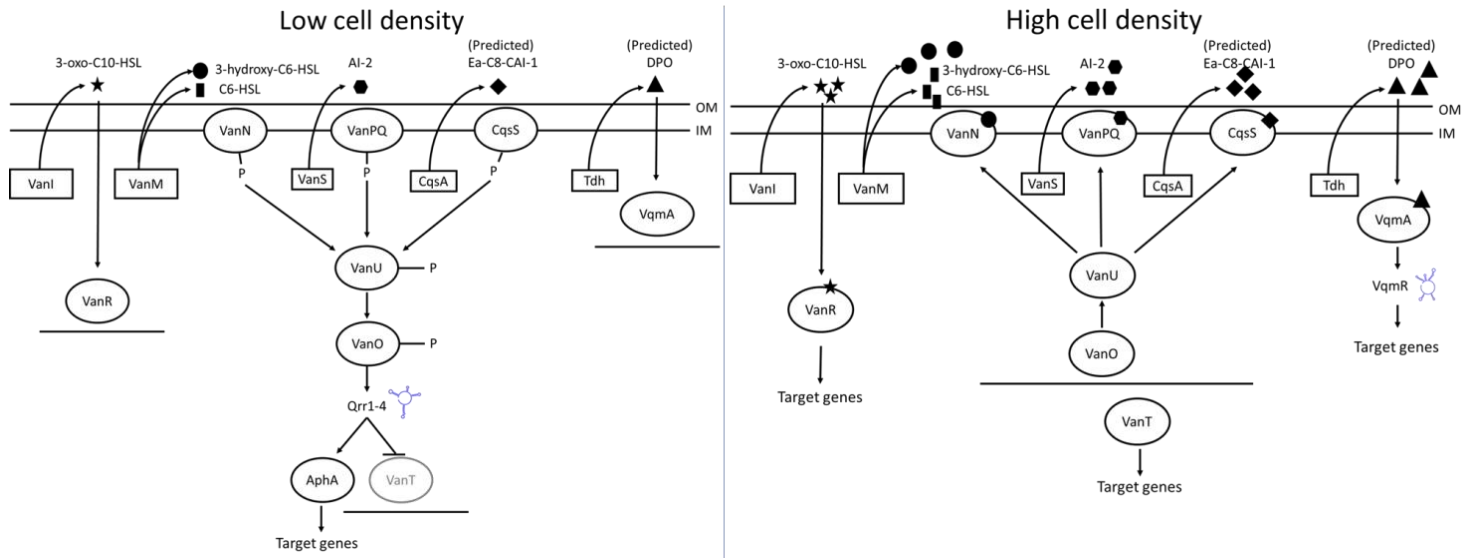

**Supplementary Figure 1.** Schematic of known and predicted components of the *V. anguillarum* QS circuits at low and high cell densities.

The central transcription factor VanT is activated upon accumulation of the indicated autoinducers via a phosphorelay. This pathway is analogous to the well-described QS phosphorelays of *V. harveyi* and *V. cholerae*<sup>1</sup>. In *V. harveyi*, the histidine kinase receptors initiate a phosphorylation cascade that activates the response regulator LuxO (homologous to VanO in *V. anguillarum*) at low cell density, when the concentrations of extracellular autoinducers are low. Phosphorylated LuxO then activates the expression of small RNAs (*qrr1–4*) which destabilize the *luxR* mRNA (homologous to *vanT* in *V. anguillarum*) and activate translation of the *aphA* mRNA. At high cell density, when the concentration of the extracellular signaling molecules reaches a threshold level, the autoinducer-bound receptors function as phosphatases, rendering LuxO in an inactive, dephosphorylated state, which terminates sRNA synthesis and allows for accumulation of the quorum-sensing transcription factor LuxR, and repression of *AphA* synthesis<sup>1</sup>. The *V. anguillarum* VanM/VanN and VanS/VanPQ are homologous to the LuxM/LuxN and LuxS/LuxPQ autoinducer synthase-receptor pairs of *V. harveyi*. VanM synthesizes N-(3-hydroxyhexanoyl) homoserine lactone (3-hydroxy-C6-HSL) and N-hexanoyl homoserine lactone (C6-HSL), while VanS synthesizes an Autoinducer-2 (AI-2) signal<sup>41,59</sup>. These two systems control QS-regulated genes via the transcription factor VanT<sup>2,3</sup>. *V. anguillarum* also harbors *aphA*<sup>4</sup>, but its role in the QS network has not yet been investigated. A third quorum-sensing synthase-receptor pair, CqsA/CqsS, is predicted to exist in *V. anguillarum*, and cell-free spent medium of *V. anguillarum* contains (*Z*)-3-aminoundec-2-en-4-one (Ea-C8-CAI-1), which in *V. harveyi* is produced by the CqsA synthase<sup>5,6</sup>. Based on homology to other *Vibrio* quorum-sensing systems, the CqsA/CqsS system is also predicted to feed into the signalling pathway controlling VanT<sup>7</sup>. In addition, genes homologous to the VqmA quorum-sensing system of *V. cholerae* are also present in *V. anguillarum*. The VqmA receptor binds 3,5-dimethylpyrazin-2-ol (DPO), an autoinducer that depends on threonine dehydrogenase (Tdh) for its synthesis<sup>8,9</sup>. Finally, *V. anguillarum* utilizes the VanI/VanR synthase-receptor pair, which is homologous to the classical LuxI/LuxR system of *V. fischeri*<sup>10</sup>. VanI produces the autoinducer N-(3-oxodecanoyl)-L-homoserine lactone (3-oxo-C10-HSL), which is detected by the VanR transcription factor<sup>11</sup>. The extent to which

the quorum-sensing signal transduction pathways of *V. anguillarum* are interdependent has not been determined, but there are clear indications of some degree of cross-regulation. For example, VanI activity seems to be dependent on VanM, since none of the AHL autoinducers are produced in a *vanM* mutant<sup>12</sup>. OM and IM indicate outer membrane and inner membrane, respectively. -P indicates that the protein is phosphorylated.

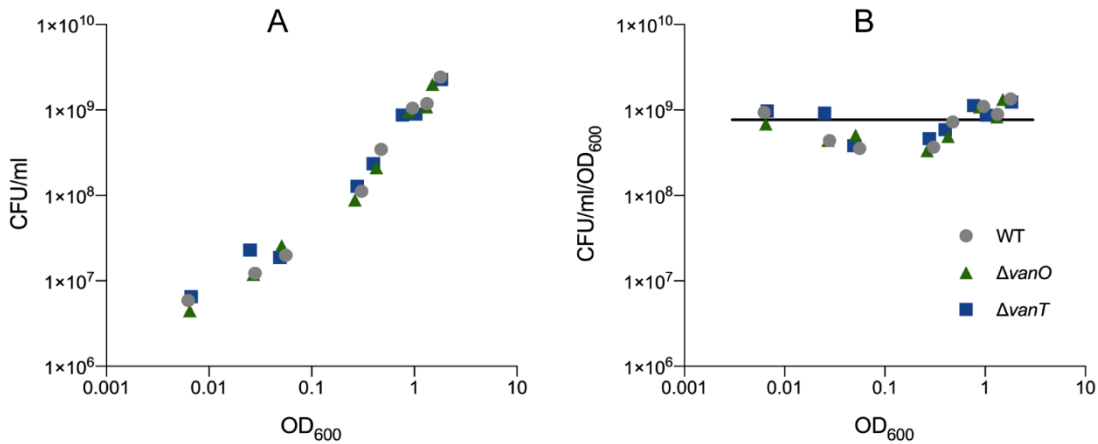

**Supplementary Figure 2.** Conversion from  $OD_{600}$  units to cells per milliliter of culture (CFU/ml).

The conversion factor from  $OD_{600}$  units to cells per milliliter of culture (CFU/ml) was estimated at  $7.7 \times 10^8 \pm 3.3 \times 10^8$  CFU/ml/ $OD_{600}$  by parallel measurements of the  $OD_{600}$  and plating of cultures of the *V. anguillarum* 90-11-287 wildtype,  $\Delta vanT$ , and  $\Delta vanO$  strains at selected time points during two of the three experiments shown in Figure 1C of the main text. Culture aliquots were rapidly diluted to appropriate cell densities in sterile LM medium supplemented with 10 mM  $MgSO_4$  and 5 mM  $CaCl_2$  and immediately plated in duplicate on LM plates. As no systematic variation in the CFU/ml/ $OD_{600}$  was observed at different cell densities or between the three strains, the conversion factor 1  $OD_{600}$  unit =  $7.7 \times 10^8 \pm 3.3 \times 10^8$  CFU/ml was simply determined as the average value of the 24 measurements shown in panel B. The error indicates one standard deviation from the mean.

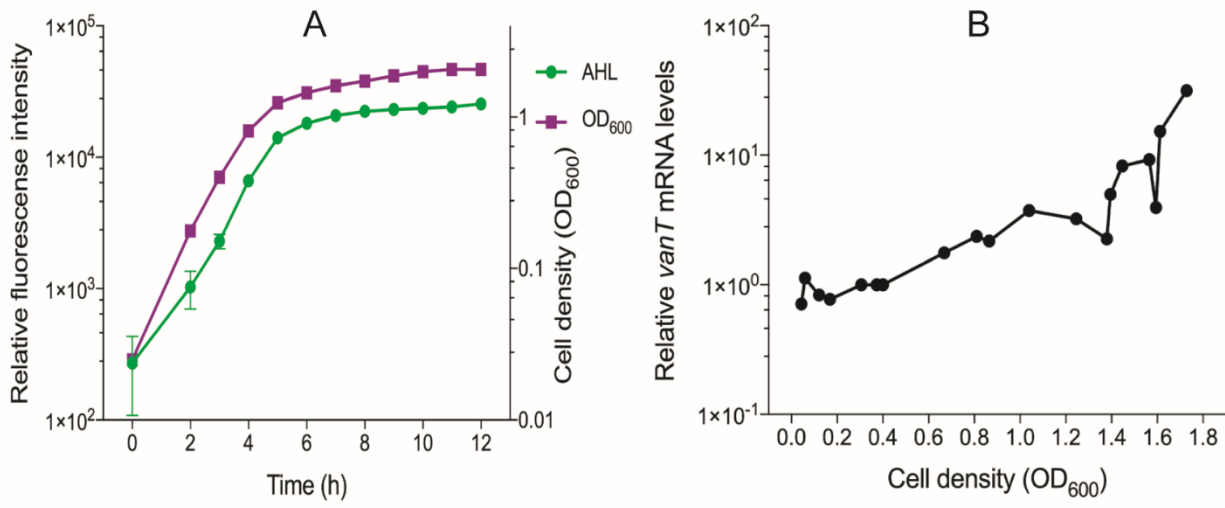

**Supplementary Figure 3.** AHL autoinducers and *vanT* mRNA accumulate in *V. anguillarum* strain 90-11-287 during growth from low to high cell density.

Aliquots of batch cultures were withdrawn at the indicated time points for measurements of AHL production, OD<sub>600</sub>, and *vanT* mRNA levels as described in Materials & Methods. The AHL assay was repeated three times with similar results. Error bars indicate standard deviation of triplicate technical replicates. The relative *vanT* mRNA levels are shown as the mean value obtained from RNA harvested from three independent cultures.

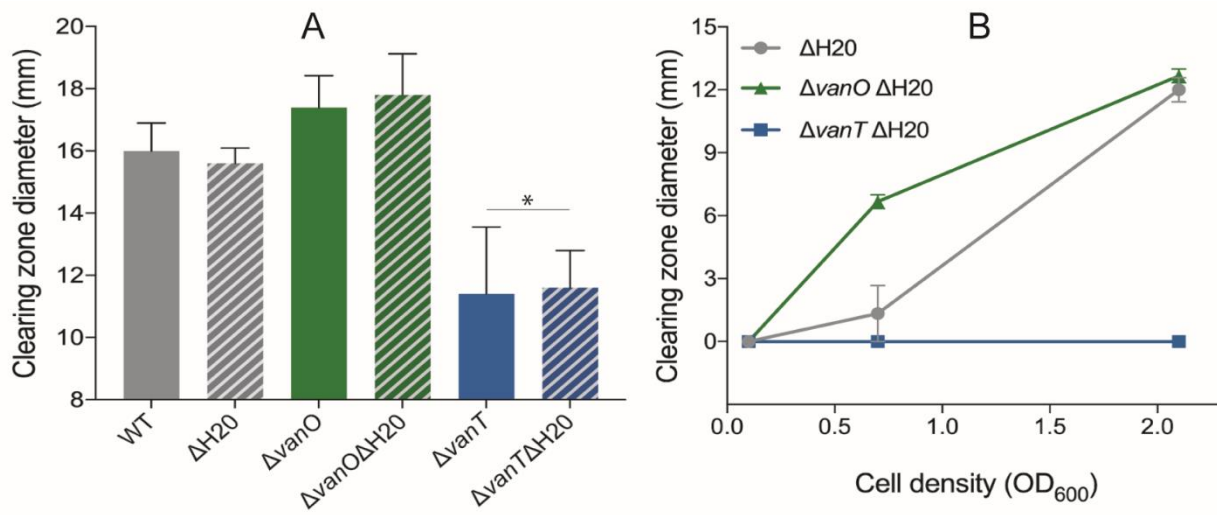

**Supplementary Figure 4.** Extracellular proteolytic activity is QS-induced.

(A) Diameter (in mm) of clearing zones produced by bacteria spotted on 2% skim milk agar. (B) Diameter of clearing zones from cell-free spent supernatant, filtered at different bacterial concentrations. Asterisks indicate significance (*ANOVA and Tukey's multiple comparison test,  $\alpha=0.05$* ) and error bars represent standard error of the mean (N=6).

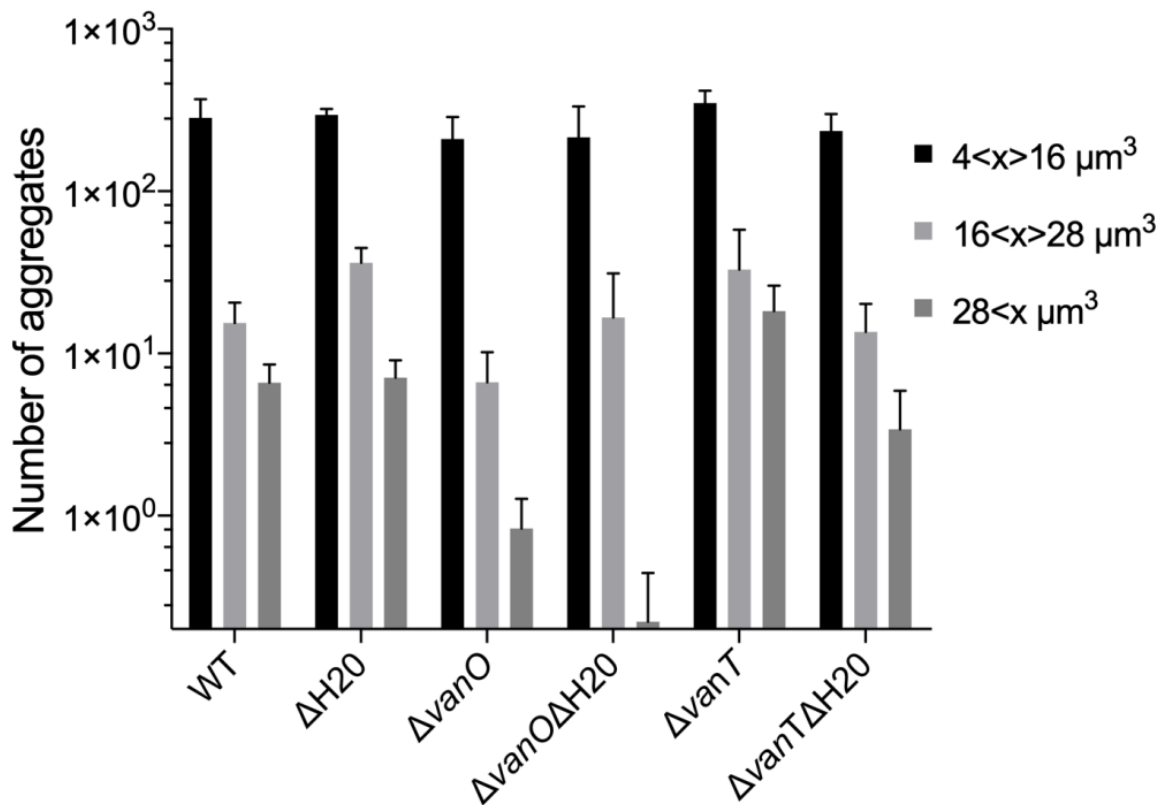

**Supplementary Figure 5.** Quantification of aggregates formed in stationary cultures of wildtype (WT), *ΔvanO* and *ΔvanT* mutants with or without the  $\phi$ H20-like prophage.

The volume of aggregates formed by the wildtype and various mutants was quantified and subsequently categorized according to size based on LIVE/DEAD staining and CLSM z-stack image acquisition (see Materials and Methods). Images were acquired for three distinct areas of the bottom of a well for averaging and the experiment was performed four times. Error bars represent standard error of the mean.

**Supplementary Table 1.** Bacterial strains, bacteriophages and plasmids used in this study

| Strains, phage or plasmids   | Genotype or relevant markers                                                                 | Reference  |
|------------------------------|----------------------------------------------------------------------------------------------|------------|
| <u><i>E. coli</i></u>        |                                                                                              |            |
| S17-1                        | <i>thi pro hsdR hsdM<sup>+</sup> recA RP4-2-Tc::Mu-Km::Tn7 λpir</i>                          | 13         |
| <u><i>V. anguillarum</i></u> |                                                                                              |            |
| BA35                         | wt, isolated from USA                                                                        | 14         |
| 90-11-287                    | wt, isolated from Denmark                                                                    | 15         |
| $\Delta vanT$                | 90-11-287 $\Delta vanT$                                                                      | this study |
| $\Delta vanO$                | 90-11-287 $\Delta vanO$                                                                      | this study |
| $\Delta H20$                 | 90-11-287 with a 45929 bp $\phi H20$ prophage deletion                                       | this study |
| $\Delta H20 \Delta vanT$     | 90-11-287 $\Delta H20 \Delta vanT$                                                           | this study |
| $\Delta H20 \Delta vanO$     | 90-11-287 $\Delta H20 \Delta vanO$                                                           | this study |
| PF430 $\Delta vanT$          | Strain PF430 $\Delta vanT$                                                                   | 16         |
| <u>Plasmids</u>              |                                                                                              |            |
| pDM4                         | Cm <sup>r</sup> ; suicide vector with an R6K origin ( <i>pir</i> requiring) and <i>sacBR</i> | 13         |
| pDTvanT                      | Cm <sup>r</sup> ; pDM4 derivative containing <i>vanT</i> flanking regions fused in-frame     | 16         |
| pDTvanO                      | Cm <sup>r</sup> ; pDM4 derivative containing <i>vanO</i> flanking regions fused in-frame     | 16         |
| pDT-H20                      | Cm <sup>r</sup> ; pDM4 derivative containing H20 flanking regions fused in-frame             | this study |
| pAHL-GFP                     | Ap <sup>r</sup> , <i>luxR</i> -P <sub>luxI</sub> - <i>gfpmut3</i>                            | 17         |
| <u>Bacteriophage</u>         |                                                                                              |            |
| $\phi Va$ -90-11-287_p41     | Genome 53 kbp, $\phi H20$ -like <i>Siphoviridae</i> , isolated from Denmark                  | 18         |
| $\phi H20$                   | Genome 53 kbp, <i>Siphoviridae</i> , isolated from Denmark                                   | 18         |
| KVP40                        | Genome 245 kbp, <i>Myoviridae</i> , isolated from Japan                                      | 19,20      |



**Supplementary Table 2.** Oligonucleotides used in this study.

| Name           | Primers (5'-3')                                                           |
|----------------|---------------------------------------------------------------------------|
| qRT-PCR (gene) |                                                                           |
| <i>recA</i>    | Forward: CTAGTCGAAATTTTTTCGACACAGC<br>Reverse: GGCTCGTTAAATTTTTATCGACTCTT |
| <i>vanT</i>    | Forward: GTCTCCACCAACCGTACTAATC<br>Reverse: GAGCGTAGCAAGATGTTCTGG         |
| H2O deletion:  |                                                                           |
| H20_1          | Forward: TTTAGATCTCATAGTCAGCACCACCGATG                                    |
| H20_2          | Reverse: CAGATCGTAGCTTCGGATCTGATCATGAGCTCTCTACG                           |
| H20_3          | Forward: GAAGCTACGATCTGCTGTAACGCGTAGGCCTCC                                |
| H20_4          | Reverse: TTTCTCGAGCGAACTCGATAACCCAAACG                                    |

#### References for Supplementary Material

1. Papenfort K, Bassler BL. Quorum sensing signal–response systems in Gram-negative bacteria. *Nat Rev Microbiol* [Internet]. 2016 Sep 1;14(9):576–88. Available from: <http://dx.doi.org/10.1038/nrmicro.2016.89>
2. Milton DL. Quorum sensing in vibrios: Complexity for diversification. *Int J Med Microbiol*. 2006;296(2–3):61–71.
3. Croxatto A, Pride J, Hardman A, Williams P, Cámara M, Milton DL. A distinctive dual-channel quorum-sensing system operates in *Vibrio anguillarum*. *Mol Microbiol*. 2004;52(6):1677–89.
4. Herzog R, Peschek N, Fröhlich KS, Schumacher K, Papenfort K. Three autoinducer molecules act in concert to control virulence gene expression in *Vibrio cholerae*. *Nucleic Acids Res*. 2019;47(6):3171–83.
5. Ng W-L, Perez LJ, Wei Y, Kraml C, Semmelhack MF, Bassler BL. Signal production and detection specificity in *Vibrio* CqsA/CqsS quorum-sensing systems. *Mol Microbiol* [Internet]. 2011 Mar;79(6):1407–17. Available from: <http://www.ncbi.nlm.nih.gov/pubmed/21219472>

6. Wei, Y., Perez, L. J., Ng, W. L., Semmelhack, M. F. & Bassler, B. L. Mechanism of *Vibrio cholerae* autoinducer-1 biosynthesis. *ACS Chem. Biol.* **6**, 356–365 (2011).
7. Henke, J. M. & Bassler, B. L. Three Parallel Quorum-Sensing Systems Regulate Gene Expression in *Vibrio harveyi*. *J. Bacteriol.* **186**, 6902–6914 (2004).
8. Papenfort, K., Förstner, K. U., Cong, J.-P., Sharma, C. M. & Bassler, B. L. Differential RNA-seq of *Vibrio cholerae* identifies the VqmR small RNA as a regulator of biofilm formation. *Proc. Natl. Acad. Sci. U. S. A.* **112**, E766-75 (2015).
9. Papenfort K., Silpe J.E., Schramma K.R., Cong J.P., Seyedsayamdost M.R., Bassler B.L. A *Vibrio cholerae* autoinducer-receptor pair that controls biofilm formation. *Nat. Chem. Biol.* **13**, 551–557 (2017).
10. Fuqua, W. C., Winans, S. C. & Greenberg, E. P. Quorum sensing in bacteria: the LuxR-LuxI family of cell density-responsive transcriptional regulators. *J. Bacteriol.* **176**, 269–75 (1994).
11. Milton D.L., Hardman A., Camara M., Chhabra S.R., Bycroft B.W., Stewart G.S. *et al.* Quorum sensing in *Vibrio anguillarum*: characterization of the vanI/vanR locus and identification of the autoinducer N-(3-oxodecanoyl)-L-homoserine lactone. *J. Bacteriol.* **179**, 3004–3012 (1997).
12. Milton D.L., Chalker V.J., Kirke D., Hardman A., Cámara M. & Williams P. The luxM homologue vanM from *Vibrio anguillarum* directs the synthesis of N-(3-hydroxyhexanoyl)homoserine lactone and N-hexanoylhomoserine lactone. *J. Bacteriol.* **183**, 3537–3547 (2001).
13. Milton, D. L., Toole, R., Hörstedt, P. & Wolf-Watz, H. Flagellin A is essential for the virulence of *Vibrio anguillarum*. *J. Bacteriol.* **178**, 1310 (1996).
14. Pedersen, K., Gram, L., Austin, D. A. & Austin, B. Pathogenicity of *Vibrio anguillarum* serogroup O1 strains compared to plasmids, outer membrane protein profiles and siderophore production. *J. Appl. Microbiol.* **82**, 365–371 (1997).

15. Skov, M. N., Pedersen, K. & Larsen, J. L. Comparison of Pulsed-Field Gel Electrophoresis , Ribotyping, and Plasmid Profiling for Typing of *Vibrio anguillarum* These include : Comparison of Pulsed-Field Gel Electrophoresis , Ribotyping , and Plasmid Profiling for Typing of *Vibrio anguillarum* Serov. *Appl Environ. Microbiol* **61**, 1540–1545 (1995).
16. Tan, D., Svenningsen, S. L. & Middelboe, M. Quorum Sensing Determines the Choice of Antiphage Defense Strategy in *Vibrio anguillarum*. *MBio* **6**, e00627 (2015).
17. Burmølle, M., Hansen, L. H., Oregaard, G. & Sørensen, S. J. Presence of N-Acyl Homoserine Lactones in Soil Detected by a Whole-Cell Biosensor and Flow Cytometry. *Microb. Ecol.* **45**, 226–236 (2003).
18. Tan, D., Gram, L. & Middelboe, M. Vibriophages and their interactions with the fish pathogen *Vibrio anguillarum*. *Appl. Environ. Microbiol.* **80**, 3128–40 (2014).
19. Matsuzaki, S., Tanaka, S., Koga, T. & Kawata, T. A broad-host-range vibriophage, KVP40, isolated from sea water. *Microbiol. Immunol.* **36**, 93–7 (1992).
20. Miller E.S., Heidelberg J.F., Eisen J.A., Nelson W.C., Durkin A.S., Ciecko A. *et al.* Complete genome sequence of the broad-host-range vibriophage KVP40: comparative genomics of a T4-related bacteriophage. *J. Bacteriol.* **185**, 5220–33 (2003).
